# Supplementary material for: Glycemic Status and Prognosis of Patients with Squamous Cell Carcinoma of the Esophagus
Source: Springer Nature journal article supplement (doi:10.1007/s00268-017-4036-1), 2017-04-26
Supplement: MOESM1 [file 12249532]

**Supplemental Table 1.**

**Patient characteristics and surgical outcomes according to glycemic status**

| **Variables** | **Well control**  **(n = 593)** | **Poor control**  **(n = 30)** | ***P*-value** |
| --- | --- | --- | --- |
| Age (years) | 65 (31–84) | 63 (49–82) | 0.850 |
| Sex  Male  Female | 494 (83.3)  99 (16.7) | 27 (90.0)  3 (10.0) | 0.452 |
| Body mass index (kg/m2) | 21.7 (13.5–31.6) | 20.6 (15.0–31.2) | 0.416 |
| HbA1c (%) | 5.6 (4.4–6.9) | 7.5 (7.0–10.0) | <0.001* |
| Time of surgery  2005–2010  2011–2014 | 308 (51.9)  285 (48.1) | 15 (50.0)  15 (50.0) | 0.854 |
| Preoperative treatment  Chemotherapy  Chemoradiotherapy  None | 227 (38.3)  33 (5.6)  333 (56.2) | 11 (36.7)  1 (3.3)  18 (60.0) | 0.951 |
| Postoperative pneumonia  Presence  Absence | 143 (24.1)  450 (75.9) | 6 (20.0)  24 (80.0) | 0.826 |
| Anastomotic leak  Presence  Absence | 74 (12.5)  519 (87.5) | 7 (23.3)  23 (76.7) | 0.094† |
| T category (pathological)  T0–2  T3–4 | 384 (64.8)  209 (35.2) | 15 (50.0)  15 (50.0) | 0.119 |
| N category (pathological)  N0  N1–3 | 281 (47.4)  312 (52.6) | 8 (26.7)  22 (73.3) | 0.037* |
| Stage (pathological)  Stages 0–II  Stages III–IV | 375 (63.2)  218 (36.8) | 14 (46.7)  16 (53.3) | 0.082† |

Data are presented as the median (range) or *n* (%). HbA1c, glycosylated hemoglobin. **P* < 0.05, †*P* < 0.10
